# Supplementary material for: Flavonoids with Anti-Angiogenesis Function in Cancer
Source: MDPI journal article supplement (doi:10.3390/molecules29071570), 2024-03-31
Supplement: s1 [file s1]

# Supplementary Material

## Flavonoids with Anti-angiogenesis Function in Cancer

Table S1. Antiangiogenic molecular mechanisms of different flavonoids.

| Type    | Compounds<br>(No.) | Cancer moder/cell line                                       | Event                                                         | Mechanism                                                                        | Reference |
|---------|--------------------|--------------------------------------------------------------|---------------------------------------------------------------|----------------------------------------------------------------------------------|-----------|
| Flavone | Scutellarin(1)     | HUVECs, CAM; colon cancer HCT116, LOVO, SW480 and HT29 cells | ↓Tube formation and ephrinb2                                  | Targeting ephrinb2 signaling                                                     | [1]       |
| Flavone | Scutellarin(1)     | Human oral cancer SAS cells                                  | ↓MMP-2, MMP-9, integrin $\alpha v \beta 6$                    | Possibly regulating transcription factor AP-1                                    | [2]       |
| Flavone | Scutellarin(1)     | Melanoma A375 cells                                          | ↓p-Akt, p-mTOR, VEGF-A, MMP-2, MMP-9                          | Inhibiting PI3K/Akt/mTOR pathway                                                 | [3]       |
| Flavone | Tricin(2)          | HUVECs                                                       | ↓VEGFR2 and VEGF                                              | Reducing ROS; inhibiting HIF-1 $\alpha$ accumulation                             | [4]       |
| Flavone | Chrysin(3)         | Prostate cancer DU145 cells                                  | ↓HIF-1 $\alpha$                                               | Regulating PI3K/Akt signaling                                                    | [5]       |
| Flavone | Chrysin(3)         | HUVECs                                                       | ↓gp130, sIL-6R, phosphorylated JAK1 and STAT3, VEGF           | Downregulating JAK1/STAT3 pathway                                                | [6]       |
| Flavone | Chrysin(3)         | HUVECs, CAM                                                  | ↓VEGF, VEGFR2, L-6, IL-6R                                     | Downregulating VEGF/VEGFR2 expression                                            | [7]       |
| Flavone | TTF1(4)            | HepG-2-transplanted nude mice                                | ↓VEGF, KDR, bFGF, COX-2, HIF-1 $\alpha$                       | Downregulating VEGF, KDR, bFGF, HIF-1 $\alpha$ and COX-2                         | [8]       |
| Flavone | Luteonin(5)        | Breast cancer MCF-7 cells                                    | ↓AEG-1, MMP-2                                                 | Downregulating AEG-1 and MMP-2                                                   | [9]       |
| Flavone | Luteonin(5)        | BGC-823-transplanted nude mice                               | ↓VEGF-A, MMP-9                                                | Stimulating immune response and down-regulating VEGF-A and MMP-9                 | [10]      |
| Flavone | Luteonin(5)        | HUVECs, prostate cancer PC-3 cells                           | ↓VEGFR2, Akt, ERK, mTOR, P70S6K, MMP-2 and MMP-9              | Inhibiting AKT/ERK/mTOR/P70S6K/MMPs pathway                                      | [11]      |
| Flavone | Luteonin(5)        | Human pancreatic carcinoma PANC-1, CoLo-357, BxPC-3 cells    | ↓VEGF secretion and expression; ↑phosphorylation level of JNK | Elevating JNK phosphorylation and inhibiting NF- $\kappa$ B-DNA binding activity | [12]      |
| Flavone | Luteonin(5)        | HMECs-1                                                      | ↓PI3K, Akt, mTOR, p70S6k; ↓MMP-2, MMP-9, HSP90                | Blocking Gas6/Axl pathway and PI3K/Akt/mTOR pathway                              | [13]      |
| Flavone | Luteonin(5)        | Mouse macrophage cells RAW264.7                              | ↓VEGF, HIF-1 $\alpha$ , MMP9                                  | Downregulating HIF-1 $\alpha$ and STAT3 signalling                               | [14]      |

|         |                 |                                                             |                                                                                      |                                                                            |      |
|---------|-----------------|-------------------------------------------------------------|--------------------------------------------------------------------------------------|----------------------------------------------------------------------------|------|
| Flavone | Luteonin(5)     | HUVECs                                                      | ↓MMP-2, IL-6Rα;<br>↑SOCS3                                                            | Modulating IL-6/STAT3 pathway                                              | [15] |
| Flavone | Wogonin(6)      | Breast cancer MCF-7 cells                                   | ↓HIF-1α, VEGF, MMP9;<br>↑PHD 1, 2, 3 and VHL;<br>↓EGFR, Cdk4, survivin               | Degrading HIF-1α protein                                                   | [16] |
| Flavone | Wogonin(6)      | RPMI-8226 multiple myeloma cells                            | ↓VEGF, PDGF, bFGF, VHL complex, VHL sumoylation and ubiquitination, c-Myc, HIF-1α    | Modulating c-Myc/HIF-1α/VEGF signaling axis                                | [17] |
| Flavone | Wogonin(6)      | Human gastric carcinoma in nude mice; HUVECs                | ↓ ERK1/2, AKT and p38                                                                | Inhibiting VEGFR2 phosphorylation                                          | [18] |
| Flavone | Wogonin(6)      | HUVECs                                                      | ↓VEGF; PI3K and phosphorylation of Akt;<br>↑PTEN;<br>↓phosphorylation of IKK and IκB | Suppressing PI3K/Akt/NF-κB signaling                                       | [19] |
| Flavone | Wogonoside(7)   | Breast cancer MCF-7 cells                                   | ↓VEGF, Wnt3a; ↑GSK-3β, AXIN; promoting phosphorylation of β-catenin                  | Suppressing Wnt/β-catenin pathway                                          | [20] |
| Flavone | Nobiletin(8)    | HUVECs                                                      | ↓ERK1/2, JNK, c-Jun, STAT3, proMMP-2, MMP-2, PA, Upa;<br>↑caspas3                    | Inhibiting VEGF- and bFGF-induced signaling and activating caspase pathway | [21] |
| Flavone | Nobiletin(8)    | Human ovarian cancer OVCAR-3 and CP70 cells                 | ↓VEGF, HIF-1α, AKT, NF-κB                                                            | Inhibiting Akt phosphorylation                                             | [22] |
| Flavone | Nobiletin(8)    | Breast cancer MCF-7 and T47D cells                          | ↓VEGF, EGFR, bFGF, Src, FAK, STAT3, PXN; MMP2, MMP3, MMP9                            | Mediating Src/FAK/STAT3 signaling                                          | [23] |
| Flavone | Oroxylin A(9)   | HUVECs                                                      | ↓phosphorylation of p38 MAPK, ERK1/2, Akt                                            | Blocking KDR/Flk-1 phosphorylation                                         | [24] |
| Flavone | Oroxyloside(10) | EA.hy926 human endothelial cell-like cell, NSCLC A549 cells | ↓phosphorylated VEGFR2, Akt, p38, ERK, IKK, IκB, p65; ↑R-Ras, E-cadherin             | Inhibiting Akt/MAPK/NF-κB pathway                                          | [25] |
| Flavone | Baicalein(11)   | NSCLC H-460, A549 and SKMES1 cells, xenografts              | ↓FGFR-2, VEGF, MMP1, TEK and ANGPT1                                                  | Partly mediated via VEGF and FGFR-2 signalling                             | [26] |
| Flavone | Baicalein(11)   | HUVECs                                                      | ↓MMP-2; inhibiting migration, proliferation                                          | Reducing cell-associated MMP-2 activity                                    | [27] |

|         |                   |                                                                      |                                                                                                             |                                                                                       |      |
|---------|-------------------|----------------------------------------------------------------------|-------------------------------------------------------------------------------------------------------------|---------------------------------------------------------------------------------------|------|
|         |                   |                                                                      | and capillary formation<br>of vascular endothelial<br>cells                                                 |                                                                                       |      |
| Flavone | Baicalein(11)     | Ovarian cancer<br>OVCAR-3 and CP-70<br>cells                         | ↓VEGF, c-Myc, HIF- $\alpha$ ,<br>NF- $\kappa$ B                                                             | Inhibiting VEGF, HIF-1 $\alpha$ , cMyc<br>and NF $\kappa$ B                           | [28] |
| Flavone | Baicalein(11)     | BV2 murine microglial<br>cells                                       | ↓HIF-1 $\alpha$ , iNOS, COX-2,<br>VEGF                                                                      | Inhibiting ROS and PI 3K/Akt<br>pathway                                               | [29] |
| Flavone | Baicalein(11)     | HUVECs                                                               | ↓phosphorylation of<br>VEGF2 and ERK, cyclin<br>D, cyclin E, cdk-4, cdk-6,<br>Rb; ↑p16, p21, p27 and<br>p53 | Regulating p53/Rb signaling;<br>inhibiting ERK1/2 and p38 MAPK<br>phospho- activation | [30] |
| Flavone | Baicalein(11)     | HUVECs                                                               | ↓AKT, ERK1/2, p38,<br>TRAF6                                                                                 | Regulating TRAF6 mediated TLR4<br>pathway                                             | [31] |
| Flavone | Genkwanin(12<br>) | HUVECs                                                               | ↓VEGF-induced invasion,<br>tube formation                                                                   | Inhibiting invasion and tube<br>formation                                             | [32] |
| Flavone | Acacetin(13)      | Human ovarian cancer<br>OVCAR-3 and A2780<br>cells                   | ↓HIF-1 $\alpha$ , VEGF and<br>p-Akt                                                                         | Inhibiting AKT/HIF-1 $\alpha$ pathway                                                 | [33] |
| Flavone | Acacetin(13)      | HUVECs                                                               | ↓VEGF, eNOS, iNOS,<br>MMP-2, bFGF                                                                           | Suppressing the STAT-VEGF axis                                                        | [34] |
| Flavone | Apigenin(14)      | HUVECs                                                               | ↓E-cadherin, PECAM-1;<br>↑cleaved caspase-3,<br>PARP, lamin A/C                                             | Blocking the ERK signaling and<br>ERK 1/2 survival signaling                          | [35] |
| Flavone | Apigenin(14)      | Human ovarian cancer<br>OVCAR-3 and<br>A2780/CP70 cells              | ↓VEGF, HIF-1 $\alpha$ , HDM2;<br>↑p53                                                                       | Regulating PI3K/AKT/p70S6K1<br>and HDM2/p53 pathways                                  | [36] |
| Flavone | Apigenin(14)      | Human pancreatic<br>cancer S2-013 and<br>CD18 cells                  | ↓HIF-1 $\alpha$ , GLUT-1, VEGF                                                                              | Downregulating HIF-1 $\alpha$ ,<br>GLUT-1 and VEGF                                    | [37] |
| Flavone | Apigenin(14)      | TRAMP mice                                                           | ↓VEGF, uPA, MMP-2,<br>MMP-9; ↑p-Akt and<br>p-ERK1/2                                                         | Attenuating IGF-I/IGFBP-3<br>signaling                                                | [38] |
| Flavone | Eupafolin(15)     | Hepatocellular<br>carcinoma cell<br>lines HepG2 and<br>Hep3B, HUVECs | ↓Phosphorylation of<br>ERK1/2, Akt and VEGF                                                                 | Blocking VEGFR2 activation, and<br>ERK1/2 and Akt phosphorylation                     | [39] |
| Flavone | HMM(16)           | Standard reaction<br>buffer                                          | ↓Cathepsins B and L                                                                                         | Inhibiting cathepsins B and L                                                         | [40] |
| Flavone | Eupatorin(17)     | Human breast cancer<br>MCF-7 and<br>MDA-MB-231 cells                 | ↓Bcl2L11, VEGFA, HIF1A<br>genes; ↑Bax gene                                                                  | Blocking the phospho-Akt<br>pathway and cell cycle                                    | [41] |
| Flavone | Sotetsuflavone    | NSCLC A549 cells                                                     | ↓VEGF, HIF-1 $\alpha$ , MMP-9,                                                                              | Modulating PI3K/AKT and                                                               | [42] |

|            |                        |                                                                                                  |                                                                                                                                                |                                                                                                                                                     |      |
|------------|------------------------|--------------------------------------------------------------------------------------------------|------------------------------------------------------------------------------------------------------------------------------------------------|-----------------------------------------------------------------------------------------------------------------------------------------------------|------|
|            | (18)                   |                                                                                                  | MMP-13,TNF- $\alpha$ ;<br>$\uparrow$ angiostatin                                                                                               | TNF- $\alpha$ /NF- $\kappa$ B pathways                                                                                                              |      |
| Flavone    | Sotetsuflavone<br>(18) | NSCLC A549 cells                                                                                 | $\downarrow$ TGF- $\beta$ ,<br>$\beta$ -catenin;<br>ZO-1                                                                                       | STAT3,<br>$\uparrow$ endostatin,<br>Inhibiting TGF- $\beta$ , STAT3 and<br>$\beta$ -catenin; increasing endostatin<br>and ZO-1                      | [43] |
| Flavone    | Morusin(19)            | Human HCC HepG2<br>and Hep3B cells,<br>HUVECs                                                    | $\downarrow$ Bcl-2, VEGF, MMP2,<br>MMP9, VEGFR2, IL-6<br>and phosphorylated<br>STAT3; $\uparrow$ Bax, active<br>caspase-3                      | Attenuating IL-6/STAT3 signaling                                                                                                                    | [44] |
| Flavone    | Morusin(19)            | NSCLC A549 cells                                                                                 | $\downarrow$ Genes expression of<br>VEGF and COX-2                                                                                             | Inhibiting VEGF and COX-2 genes                                                                                                                     | [45] |
| Isoflavone | Genistein(20)          | Human prostate cancer<br>PC-3 cells, HUVECs                                                      | $\downarrow$ VEGF, HIF-1 $\alpha$                                                                                                              | Suppressing autocrine and<br>paracrine signalings                                                                                                   | [46] |
| Isoflavone | Genistein(20)          | Human pancreatic<br>carcinoma Capan-1,<br>Capan-2, AsPc-1,<br>PANC-1,<br>and Mia PaCa-2<br>cells | $\downarrow$ VEGF, HIF-1                                                                                                                       | Inhibiting hypoxic activation of<br>HIF-1 to downregulating VEGF<br>gene expression                                                                 | [47] |
| Isoflavone | Genistein(20)          | HUVECs                                                                                           | $\downarrow$ MMP-1, MT1-MMP,<br>pro-MMP-2, TIMP-1,<br>TIMP-2, uPA, PAI-1                                                                       | Preventing MMP-1 and uPA and<br>the activation of pro-MMP-2, and<br>modulating TIMP-1 and -2, and<br>PAI-1                                          | [48] |
| Isoflavone | Genistein(20)          | Human bladder cancer<br>RT4, T24, TSGH8301<br>cells                                              | $\downarrow$ VEGF, PDGF-A, TF,<br>uPA, MMP-2, MMP-9;<br>$\uparrow$ PAI-1, endostatin,<br>angiostatin, TSP-1                                    | Inhibiting VEGF, PDGF-A, TF,<br>uPA, MMP-2 and MMP-9;<br>upregulating PAI-1, endostatin,<br>angiostatin and TSP-1                                   | [49] |
| Isoflavone | Genistein(20)          | Human prostate cancer<br>PC3 cells                                                               | $\downarrow$ MMP-9, type IV<br>collagenase, uPA, uPAR,<br>protease M, PAR-2,<br>VEGF, VEGFR, TGF-b,<br>BPGF,LPA, TSP; $\uparrow$ CTGF,<br>CTAP | Downregulating type IV<br>collagenase, uPA, uPAR,protease<br>M, PAR-2, VEGF, VEGFR, TGF-b,<br>BPGF,LPA, and TSP, and<br>up-regulating CTGF and CTAP | [50] |
| Isoflavone | Genistein(20)          | HUVECs                                                                                           | $\downarrow$ MMP-2, MMP-9, JNK,<br>p38, PTK                                                                                                    | Downregulating JNK and p38<br>activation                                                                                                            | [51] |
| Flavonol   | Quercetin(21)          | HUVECs, human<br>prostate cancer PC3<br>cells                                                    | $\downarrow$ mTOR, Akt, p70S6K,                                                                                                                | Regulating AKT/mTOR/P70S6K<br>signaling                                                                                                             | [52] |
| Flavonol   | Quercetin(21)          | Human oral cancer SAS<br>cells                                                                   | $\downarrow$ MMP-2, MMP-9                                                                                                                      | Inhibiting NF- $\kappa$ B and<br>MMP-2/MMP-9 signaling                                                                                              | [53] |
| Flavonol   | Quercetin(21)          | Mammary carcinoma<br>model                                                                       | $\downarrow$ MVD, VEGF, Bfgf,<br>H-ras protein                                                                                                 | Inhibiting the H-ras protein<br>synthesis, and VEGF and bFGF                                                                                        | [54] |
| Flavonol   | Quercetin(21)          | HUVECs, human                                                                                    | $\uparrow$ TSP-1                                                                                                                               | Upregulating TSP-1                                                                                                                                  | [55] |

|          |               |                                                       |                                                                                              |                                                                                                      |      |
|----------|---------------|-------------------------------------------------------|----------------------------------------------------------------------------------------------|------------------------------------------------------------------------------------------------------|------|
|          |               | prostate cancer PC3 cells                             |                                                                                              |                                                                                                      |      |
| Flavonol | Quercetin(21) | Lung cancer squamous carcinoma NCI-H157 cells         | ↓VEGF, p-Akt, p-STAT3                                                                        | Suppressing STAT3 tyrosine phosphorylation, and Akt phosphorylation,                                 | [56] |
| Flavonol | Quercetin(21) | Nasopharyngeal carcinoma NPC039 cells                 | ↓VEGF, NF-κB                                                                                 | Suppressing NF-κB activity                                                                           | [57] |
| Flavonol | Quercetin(21) | Bovine aortic endothelial cells                       | ↓eNOS                                                                                        | Suppressing eNOS and early M-phase cell cycle arrest                                                 | [58] |
| Flavonol | Quercetin(21) | Human breast cancer MDA-MB-231 and MCF7 cells, HUVECs | ↓COX-2 and PGE2 by inhibiting the binding of the transactivators CREB2, c-Jun, C/EBPβ, NF-κB | Inhibiting the p300 signaling and blocking the binding of multiple transactivators to COX-2 promoter | [59] |
| Flavonol | QODG(22)      | HUVECs                                                | ↓VEGFR2, c-Src, FAK, ERK, AKT, mTOR, p70S6K                                                  | Suppressing VEGFR2-mediated signaling                                                                | [60] |
| Flavonol | Silibinin(23) | Human bladder transitional cell papilloma RT4 cells   | ↓Survivin; ↑p53                                                                              | Downregulating survivin and increase p53                                                             | [61] |
| Flavonol | Silibinin(23) | Colon cancer LoVo cells                               | ↓VEGF; ↑VEGFR1                                                                               | Upregulating VEGFR-1                                                                                 | [62] |
| Flavonol | Silibinin(23) | Human prostate DU145 tumor xenografts                 | ↓MVD, VEGF; ↑IGFBP-3                                                                         | Inhibiting VEGF and endothelial cell growth, and inducing apoptosis                                  | [63] |
| Flavonol | Silibinin(23) | Female SKH-1 hairless mice                            | ↓HIF-1α, STAT3, NF-κB, COX-2, iNOS, Tyr <sup>705</sup> and Ser <sup>536</sup>                | Inhibiting NF-κB signaling                                                                           | [64] |
| Flavonol | Silibinin(23) | Transgenic mouse model of prostate cancer             | ↓VEGF, VEGFR2, bFGF                                                                          | Downregulating VEGF, VEGFR-2, and bFGF                                                               | [65] |
| Flavonol | Silibinin(23) | Human colorectal carcinoma HT29 xenograft tumor       | ↓NOS, NOS3, COX-1, COX-2, HIF-1α and VEGF                                                    | Downregulating NOS, COX, HIF-1α, and VEGF expression                                                 | [66] |
| Flavonol | Silibinin(23) | HUVECs                                                | ↓MMP-2, survivin; ↑Kip1/p27, Cip1/p21, p53                                                   | Downregulating survivin; inhibiting Akt and NF-κB signaling, and MMP-2 secretion                     | [67] |
| Flavonol | Silibinin(23) | Human cervical (HeLa) and hepatoma (Hep3B) cells      | ↓HIF-1α, VEGF                                                                                | Inhibiting PI3K/Akt signaling                                                                        | [68] |
| Flavonol | Silibinin(23) | Human breast cancer MCF-7 cells                       | ↓MMP-9, VEGF                                                                                 | Inactivating the Raf/MEK/ERK pathway                                                                 | [69] |

|          |                |                                                                |                                                                                                                           |                                                                                                                                                                            |         |
|----------|----------------|----------------------------------------------------------------|---------------------------------------------------------------------------------------------------------------------------|----------------------------------------------------------------------------------------------------------------------------------------------------------------------------|---------|
| Flavonol | Myricetin(24)  | SKH-1 hairless mouse skin tumorigenesis model                  | ↓HIF-1 $\alpha$ , MMP-9, MMP-13                                                                                           | Suppressing PI-3 kinase activity and attenuating Akt/p70S6K phosphorylation                                                                                                | [70]    |
| Flavonol | Myricetin(24)  | Ovarian cancer A2780/CP70 and OVCAR-3 cells                    | ↓VEGF, p-Akt, p-70S6K, HIF-1 $\alpha$                                                                                     | Modulating Akt/p70S6K/HIF-1 $\alpha$ /VEGF pathway and p21/HIF-1 $\alpha$ /VEGF                                                                                            | [71]    |
| Flavonol | Myricetin(24)  | HUVECs                                                         | ↓Cell migration, tube formation                                                                                           | Suppressing PI3K/Akt/mTOR signaling                                                                                                                                        | [72]    |
| Flavonol | Kaempferol(25) | Ovarian cancer OVCAR-3 and A2780/CP70 cells                    | ↓VEGF, ERK phosphorelation, NF- $\kappa$ B, cMyc; ↑p21                                                                    | Regulating ERK-NF- $\kappa$ B-cMyc-p21-VEGF pathway                                                                                                                        | [73]    |
| Flavonol | Kaempferol(25) | Ovarian cancer OVCAR-3 and A2780/CP70 cells                    | ↓VEGF, HIF-1 $\alpha$                                                                                                     | Modulating Akt/HIF and ESRR $\alpha$ pathways                                                                                                                              | [74]    |
| Flavonol | Kaempferol(25) | HUVECs                                                         | ↓VEGFR2, p-Akt, p-p38                                                                                                     | Inhibiting VEGFR2 expression, and VEGF and FGF pathways                                                                                                                    | [75]    |
| Flavonol | Kaempferol(25) | HUVECs                                                         | ↓VEGFR2, PI3K, AKT, mTOR, MEK1/2, ERK1/2                                                                                  | Targeting VEGFR2 and downregulating the PI3K/AKT, MEK and ERK pathways                                                                                                     | [76]    |
| Flavonol | Kaempferol(25) | HUVECs                                                         | ↓HIF-1 $\alpha$ , VEGFR2, ERK, p38, Akt, mTOR                                                                             | Modulating ERK/p38 MAPK and PI3K/Akt/mTOR pathways                                                                                                                         | [77]    |
| Flavonol | Rhamnazin(26)  | HUVECs, human breast cancer MDA-MB-231 cells                   | ↓VEGFR2, MAPK, AKT, STAT3; ↑PEDF                                                                                          | Regulating VEGF and PEDF; downregulating the VEGFR2/STAT3/MAPK/Akt pathway                                                                                                 | [78,79] |
| Flavonol | Galangin(27)   | HUVECs                                                         | ↓VEGF                                                                                                                     | Downregulating CD44 and VEGF                                                                                                                                               | [80]    |
| Flavonol | Galangin(27)   | Ovarian cancer A2780/CP70 and OVCAR-3 cells                    | ↓VEGF, p-Akt, p-70S6K, HIF-1 $\alpha$                                                                                     | Modulating Akt/p70S6K/HIF-1 $\alpha$ /VEGF pathway                                                                                                                         | [71]    |
| Flavonol | Fisetin(28)    | HUVECs, HT-1080 cells                                          | ↓MMP-14, MMP-1, MMP-3, MMP-7, MMP-9                                                                                       | Inhibiting the relational MMPs                                                                                                                                             | [81]    |
| Flavonol | Fisetin(28)    | Colorectal cancer                                              | ↓MMP-8, MMP-13                                                                                                            | Inhibiting MMP-8 and MMP-13                                                                                                                                                | [82]    |
| Flavonol | Fisetin(28)    | HUVECs, prostate carcinoma DU145 and lung carcinoma A549 cells | ↓Cyclin D1, survivin, VEGF, eNOS, iNOS, MMP-1, -3, -7, -9 and -14, Bcl-2; ↑caspases-3 and caspases-7, PARP, p53, p21, Bax | G1 phrase-G2/M arrest; Downregulating cyclin D1, survivin, VEGF, eNOS, iNOS, MMPs, Bcl-2; inducing p53 and p21, Bax expression and cleavage of caspases-3 and -7, and PARP | [83-84] |
| Flavonol | Fisetin(28)    | Breast cancer 4T1 and JC cells                                 | ↓HO-1, MMP-2, MMP-9                                                                                                       | Regulated by HO-1 through transcription factor Nrf2                                                                                                                        | [85]    |
| Flavonol | Fisetin(28)    | Human prostate cancer PC-3 cells                               | ↓MMP-2, MMP-9                                                                                                             | Inactivating PI3K/Akt and JNK pathways and diminishing NF- $\kappa$ B and AP-1 DNA-binding activities                                                                      | [86]    |

|            |             |                                                                            |                                                                                                     |                                                                                  |          |
|------------|-------------|----------------------------------------------------------------------------|-----------------------------------------------------------------------------------------------------|----------------------------------------------------------------------------------|----------|
| Flavonol   | Fisetin(28) | Human cervical adenocarcinoma SiHa and CaSki cells                         | ↓uPA, p-p38, NF-κB                                                                                  | Inhibiting p38 MAPK-dependent NF-κB pathway                                      | [87]     |
| Flavonol   | Fisetin(28) | Pancreatic cancer cells                                                    | ↓NF-κB, MMP9, EGFR, HER-2                                                                           | Inhibiting DR3-mediated NF-κB activation                                         | [88- 89] |
| Flavonol   | Fisetin(28) | Prostate cancer                                                            | ↓NF-κB, MAPK, Wnt, Akt, mTOR                                                                        | Inhibiting NF-κB, MAPK, Wnt, Akt and mTOR                                        | [90-91]  |
| Flavanonol | EGCG(29)    | HUVECs                                                                     | ↓VEGFR-2, VEGF;                                                                                     | Inhibiting VEGF-induced VEGFR2 signaling                                         | [92- 93] |
| Flavanonol | EGCG(29)    | Human endothelial cells                                                    | ↓VEGF, VEGFR-1 and -2, ERK-1 and -2, MMP-2, MMP -9                                                  | Downregulating VEGF, VEGFR-1 and -2, ERK-1 and -2, MMP-2 and -9                  | [94-95]  |
| Flavanonol | EGCG(29)    | SW620 colon cancer cells                                                   | ↓MMP-9, NF-κB p-ERK1/2                                                                              | Suppressing NF-κB and ERK1/2 signaling                                           | [96]     |
| Flavanonol | EGCG(29)    | NSCLC A549 cells                                                           | ↓VEGF; ↑Endostatin                                                                                  | Increasing endostatin and suppressing VEGF                                       | [97]     |
| Flavanonol | EGCG(29)    | Colorectal cancer cells SW837                                              | ↓VEGF, HIF-1α, IGF-1, IGF-2, EGF, heregulin mRNAs, VEGFR2, p-VEGFR2, p-IGF-1 receptor, p-ERK, p-Akt | Suppressing HIF-1 and VEGF/VEGFR axis activation                                 | [98]     |
| Flavanonol | EGCG(29)    | NSCLC A549 and NCI-H460 cells                                              | ↓HIF-1α, VEGF, IL-8, CD31 and Akt                                                                   | Inhibiting VEGF, IL-8, and CD31 and Akt activation                               | [99]     |
| Flavanonol | EGCG(29)    | Human gastric cancer AGS cells                                             | ↓VEGF, p-STAT3                                                                                      | Inhibiting VEGF via suppressing STAT3 activity                                   | [100]    |
| Flavanonol | EGCG(29)    | Human gastric cancer SGC-7901 cells                                        | ↓VEGF, p-STAT3                                                                                      | Inhibiting the VEGF secretion and STAT3activation                                | [101]    |
| Flavanonol | EGCG(29)    | NSCLC A549 cells                                                           | ↓ HIF-1α, VEGF, COX-2, p-Akt, p-ERK, vimentin protein, p53, β-catenin                               | Inhibiting angiogenesis and downregulating HIF-1α and VEGF                       | [102]    |
| Flavanonol | EGCG(29)    | Human prostate carcinoma LNCaP cells                                       | ↓VEGF, uPA, angiopoietin 1 and 2, MMP-2 and -9; ↑TIMP1                                              | Downregulating VEGF, uPA, angiopoietin 1 and 2, MMP-2 and -9 and elevating TIMP1 | [103]    |
| Flavanonol | EGCG(29)    | HUVECs                                                                     | ↓VEGF, endoglin, pSmad1                                                                             | Downregulating endoglin/pSmad1 signaling                                         | [104]    |
| Flavanonol | EGCG(29)    | Human cervical tumour cells (HeLa)                                         | ↓TNFAIP2, EFNA1, PDGFA, CXCL6, THBS-1, TGF-β2, CCL2; ↑ANGPTL4, ID1, IFN-β1, IL-1β                   | Modulating the genes transcription involved in the angiogenic process            | [105]    |
| Flavanonol | EGCG(29)    | Endothelial cells, endothelial progenitor cells, bone marrow stromal cells | ↓ MMP-9, p-Akt; suppressing the CD133 <sup>+</sup> /VEGFR2 <sup>+</sup> cells into peripheral       | Inhibiting Akt phosphorylation and VEGF-induced migration; downregulating MMP-9  | [106]    |

|                |                |                                                                 |                                                                                        |                                                                                      |           |
|----------------|----------------|-----------------------------------------------------------------|----------------------------------------------------------------------------------------|--------------------------------------------------------------------------------------|-----------|
|                |                |                                                                 | circulation                                                                            |                                                                                      |           |
| Flavanon<br>ol | EGCG(29)       | HUVECs                                                          | ↓ VEGF-induced DNA synthesis, VEGFR-1 and -2, ERK1/2, EGR1                             | Inhibiting DNA synthesis and cell proliferation and the signal transduction pathways | [107]     |
| Flavanon<br>ol | EGCG(29)       | Mouse breast cancer E0771 cells                                 | ↓VEGF, HIF-1 $\alpha$ , NF- $\kappa$ B                                                 | Inhibiting HIF-1 $\alpha$ , NF- $\kappa$ B and VEGF                                  | [108]     |
| Flavanon<br>ol | EGCG(29)       | NSCLC A549 cells                                                | ↓HIF-1 $\alpha$ , VEGF                                                                 | Downregulating HIF-1 $\alpha$ and VEGF                                               | [109]     |
| Flavanon<br>ol | EGCG(29)       | HUVECs                                                          | ↓ MT1-MMP                                                                              | Inhibiting MT1-MMP to block the endothelial cell invasion                            | [110]     |
| Flavanon<br>ol | EGCG(29)       | Human neuroblastoma SK-N-BE and human fibrosarcoma HT1080 cells | ↓MMP-2, MMP-9                                                                          | Inhibiting MMP-2 and MMP-9                                                           | [111]     |
| Flavanon<br>ol | EGCG(29)       | Human endometrial cancer cells AN3CA and RL95-2, stromal cells  | ↓VEGFA, HIF-1 $\alpha$ , CXCL12                                                        | Inhibiting PI3K/AKT/mTOR/HIF1 $\alpha$ pathway and downregulating CXCL12             | [112]     |
| Flavanon<br>es | Naringenin(30) | Human endothelial cells                                         | ↓ICAM-1, IL-6, MCP-1, VEGF, ERR $\alpha$ , KDR, p-Akt, p-paxillin                      | Mediating ERR $\alpha$ /VEGF/KDR signaling                                           | [113]     |
| Flavanon<br>es | HLBT-001(31)   | Ex vivo rat aortic ring                                         | ↓ capillary sprout and tube formation                                                  | Not mentioned                                                                        | [114]     |
| Flavanon<br>es | Hesperetin(32) | HUVECs                                                          | ↓p-PI3K, p-Akt, ERK, JNK, p38                                                          | Modulating PI3K/AKT, ERK and p38 MAPK signaling                                      | [115]     |
| Flavanon<br>es | Hesperetin(32) | Rat colon carcinogenesis                                        | ↓VEGF, bFGF, EGF and COX-2                                                             | Inhibiting angiogenic growth factors and COX-2 mRNA expression                       | [116]     |
| Flavanon<br>es | Didymin(33)    | HUVECs                                                          | ↓ROS, NF- $\kappa$ B, and VCAM-1, ICAM-1, E-selectin                                   | Preventing NF- $\kappa$ B and expression of adhesion molecules                       | [117]     |
| Flavanon<br>es | Farrerol(34)   | HUVECs, HMECs-1                                                 | ↓p-ERK, p-Akt, p-mTOR, p-JAK2, p-STAT3, Bcl2, Bcl-xl                                   | Downregulating Akt/mTOR, Erk and Jak2/Stat3 signals                                  | [118]     |
| Chalcon<br>e   | HSYA(35)       | Human gastric adenocarcinoma BGC-823 cells                      | ↓ MVD, IOD                                                                             | Inhibiting tumor vascularization                                                     | [119-120] |
| Chalcon<br>e   | HSYA(35)       | Human gastric adenocarcinoma BGC-823 cells                      | ↓VEGF, MMP-9, bFGF, MMP-9 mRNA                                                         | Downregulating VEGF, bFGF and MMP-9                                                  | [121]     |
| Chalcon<br>e   | HSYA(35)       | Murine hepatoma H22 cells                                       | ↓CD105, VEGFA, bFGF, VEGFR1, p-c-raf, p-ERK1/2, NF- $\kappa$ B, cyclinD1, c-myc, c-Fos | Blocking ERK/MAPK and NF- $\kappa$ B signaling                                       | [122]     |



|          |                       |                                                                          |                                                                                                                               |                                                                                    |           |
|----------|-----------------------|--------------------------------------------------------------------------|-------------------------------------------------------------------------------------------------------------------------------|------------------------------------------------------------------------------------|-----------|
| Chalcone | HSYA(35)              | Murine hepatoma H22 cells and HepG2 human hepatocellular carcinoma cells | ↓MMP-2, MMP-9, p-p38, ATF-2, COX-2                                                                                            | Inhibiting p38 MAPK phosphorylation                                                | [123]     |
| Chalcone | FLA-16(36)            | C6 and U87 gliomas                                                       | ↓20-HETE, VEGF, HIF-1 $\alpha$ , TGF- $\beta$ ; ↑survival                                                                     | Modulating PI3K/Akt signaling through inhibition of CYP4A                          | [124]     |
| Chalcone | SKLB-M8(37)           | HUVECs, B16F10 cells                                                     | ↓p-ERK1/2                                                                                                                     | Decreasing ERK1/2 phosphorylation                                                  | [125]     |
| Chalcone | LicA(38)              | HUVECs                                                                   | ↓VEGFR2, IL-6, IL-8, cSrc                                                                                                     | Blocking VEGF/VEGFR-2 signaling                                                    | [126]     |
| Chalcone | LicE(39)              | 4T1 Mammary carcinoma cells                                              | ↓VEGFR2, VEGF-A, HIF-1 $\alpha$ , COX-2, iNOS                                                                                 | Decreasing VEGFR2, VEGF-A, HIF-1 $\alpha$ , COX-2, iNOS                            | [127]     |
| Chalcone | FKB(40)               | Two breast cancer cell MCF-7 and MDA-MB231                               | ↓Angiogenin, F3, SDF-1, serpin F1, TSP-2                                                                                      | Reducing angiogenin, F3, SDF-1, serpin F1, and TSP-2                               | [128]     |
| Chalcone | FKB(40)               | MDA-MB231 cells, HUVECs                                                  | ↓MMP9, VEGF, GLUT1, FOXM1                                                                                                     | Suppressing the formation of vessels                                               | [129]     |
| Chalcone | FKA(41)               | MDA-MB231 cells                                                          | ↓VEGF, GLUT1, ICAM1                                                                                                           | Inhibiting new blood vessels                                                       | [130]     |
|          |                       | Bladder tumor tissues in UPII-SV40T transgenic mouse                     | ↓Androgen receptor                                                                                                            | Downregulating the androgen receptor                                               | [131]     |
| Chalcone | Cardamonin(42)        | SKOV3 cells                                                              | ↓HIF-1 $\alpha$ , HIF-2 $\alpha$ , VEGF, S6K1                                                                                 | Inhibiting HIF- $\alpha$ and VEGF                                                  | [132]     |
| Chalcone | Cardamonin(42)        | HUVECs                                                                   | ↓p-ERK1/2, p-AKT                                                                                                              | Regulating ERK1/2 and AKT signaling                                                | [133]     |
| Chalcone | Cardamonin(42)        | HUVECs                                                                   | ↓miR-21                                                                                                                       | Downregulating miR-21                                                              | [134]     |
| Chalcone | Isoliquiritigenin(43) | HUVECs                                                                   | ↓MMP-2, 1-MMP, JNK, p38 MAPK; ↑TIMP                                                                                           | Hampering MAPK signaling of JNK and p38                                            | [135]     |
| Chalcone | Isoliquiritigenin(43) | HUVECs, MCF-7 and MDA-MB-231cells                                        | ↓VEGF, HIF-1 $\alpha$ , VEGFR-2, p-ERK1/2, p-Akt, p-JNK, eNOS, MMP-2                                                          | Inhibiting VEGF/VEGFR2 pathway                                                     | [136]     |
| Chalcone | Isoliquiritigenin(43) | Adenoid cystic carcinoma cells ACC-M and ACC-2                           | ↓MVD, VEGF, p-mTOR, p-S6, p-ERK1/2; ↑JNK, p-TSC-2                                                                             | Dual activation of JNK and inhibition of ERK                                       | [137]     |
| Chalcone | Isoliquiritigenin(43) | HUVECs                                                                   | ↓p-ERK1/2, VEGF; ↑PEDF                                                                                                        | Inhibiting ERK1/2 and VEGF, and promoting PEDFexpression                           | [138-139] |
| Chalcone | TSAHC(44)             | TM4SF5-null SNU449Cp or TM4SF5-expressing SNU449Tp stable cells          | ↓TM4SF5-mediated EMT, multilayer growth, migration, invasion and tumor formation ; p <sup>Y577</sup> FAK, p27 <sup>Kip1</sup> | Disturbing protein-protein interaction between TM4SF5 and other membrane receptors | [140]     |
| Chalcone | Xanthohumol(45)       | HUVECs, SMC                                                              | ↓NF- $\kappa$ B                                                                                                               | Mitigating NF- $\kappa$ B activity                                                 | [141]     |

|          |                   |                                           |                                                       |                                                                                |           |
|----------|-------------------|-------------------------------------------|-------------------------------------------------------|--------------------------------------------------------------------------------|-----------|
| e        | 45)               |                                           |                                                       |                                                                                |           |
| Chalcone | Xanthohumol(45)   | MCF7 cells, endothelial cells             | ↓NF-κB, IL1β                                          | Modulating NF-κB signalling                                                    | [142]     |
| Chalcone | Xanthohumol(45)   | HUVECs                                    | ↑p-AMPK CAMMKβ, LKB1; ↓eNOS, p-mTOR, p-70S6K, p-4EBP1 | Inhibiting AMPK and AKT/mTOR pathway                                           | [143]     |
| Chalcone | Xanthohumol(45)   | U937 cells, HUVECs                        | ↓VEGF, MMP-2, MMP-9, p-p65, p-cytosolic IκBα, p-Akt   | Inhibiting Akt/NF-κB signaling to decrease VEGF secretion                      | [144-145] |
| Chalcone | Xanthohumol(45)   | KBM-5 cells                               | ↓ICAM-1, MMP-9, VEGF                                  | Inhibiting ICAM-1, MMP-9, and VEGF                                             | [146]     |
| Chalcone | Xanthohumol(45)   | BxPC-3 and AsPC-1 cells                   | ↓VEGF, IL-8, NF-κB                                    | Suppressing NF-κB activity                                                     | [147]     |
| Chalcone | Xanthoangelol(46) | HUVECs                                    | ↓VEGF                                                 | Inhibiting tube formation and the binding of VEGF to vascularendothelial cells | [148]     |
| Chalcone | Butein(47)        | EPCs                                      | ↓p-Akt, p-mTOR, p70S6K, 4E-BP1, eIF4E                 | Targeting the AKT/mTOR translation dependent signaling                         | [149]     |
| Chalcone | Butein(47)        | Human prostate cancer PC3 and DU145 cells | ↓VEGF, MMP-9                                          | Inhibiting NF-κB signaling                                                     | [150]     |

Note: "↓" indicates an increase in indicators; "↑" indicates a decrease in indicators.

## References

1. Zhu, P. T.; Mao, M.; Liu, Z. G.; Tao L.; Yan B.C. Scutellarin suppresses human colorectal cancer metastasis and angiogenesis by targeting ephrinb2. *Am. J. Transl. Res.* **2017**, *9*, 5094. <https://pubmed.ncbi.nlm.nih.gov/29218107/>
2. Li, H.X.; Huang, D.Y.; Gao, Z.X.; Chen, Y.; Zhang, L.; Zheng, J.-H. Scutellarin inhibits the growth and invasion of human tongue squamous carcinoma through the inhibition of matrix metalloproteinase-2 and-9 and αvβ6 integrin. *Int. J. Oncol.* **2013**, *42*, 1674-1681. <https://doi.org/10.3892/ijo.2013.1873>
3. Li, C. Y.; Wang, Q.; Wang, X.M.; Li, G.X.; Wei, X.L. Scutellarin inhibits the invasive potential of malignant melanoma cells through the suppression epithelial-mesenchymal transition and angiogenesis via the PI3K/Akt/mTOR signaling pathway[J]. *Eur. J. Pharmacol.* **2019**, *858*, 172463. <https://doi.org/10.1016/j.ejphar.2019.172463>
4. Han, J. M.; Kwon, H. J.; Jung, H. J. Tricin, 4', 5, 7-trihydroxy-3', 5'-dimethoxyflavone, exhibits potent antiangiogenic activity in vitro. *Int. J. Oncol.* **2016**, *49*, 1497-1504. <https://doi.org/10.3892/ijo.2016.3645>
5. Fu, B.; Xue, J.; Li, Z.; Shi, X.; Jiang, B.-H.; Fang, J. Chrysin inhibits expression of hypoxia-inducible factor-1α through reducing hypoxia-inducible factor-1α stability and inhibiting its protein synthesis. *Mol. Cancer Ther.* **2007**, *6*, 220-226. <https://doi.org/10.1158/1535-7163.mct-06-0526>
6. Lin, C.M.; Shyu, K.G.; Wang, B.W.; Chang, H.; Chen, Y.H.; Chiu, J.H. Chrysin suppresses IL-6-induced angiogenesis via down-regulation of JAK1/STAT3 and VEGF: An in vitro and in ovo approach. *J Agric Food Chem.* **2010**, *58*, 7082-7087. <https://doi.org/10.1021/jf100421w>
7. Lin, C.M.; Chang, H.; Li, S.Y.; Wu, I.H.; Chiu, J.H. Chrysin inhibits lipopolysaccharide-induced angiogenesis via down-regulation of VEGF/VEGFR-2 (KDR) and IL-6/IL-6R pathways. *Planta Med.* **2006**, *72*, 708-714. <https://doi.org/10.1055/s-2006-931602>
8. Liu, C.; Li, X. W.; Cui, L. M.; Li, L.C.; Chen, L.Y.; Zhang, X.-W. Inhibition of tumor angiogenesis by TTF1 from extract of herbal medicine. *World J. Gastroentero.* **2011**, *17*, 4875. <https://doi.org/10.3748/wjg.v17.i44.4875>
9. Jiang, Y.; Xie, K.P.; Huo, H.N.; Wang, L.M.; Zou, W.; Xie, M.J. Inhibitory effect of luteolin on the angiogenesis of chick chorioallantoic membrane and invasion of breast cancer cells via downregulation of AEG-1 and MMP-2. *Acta Physiol. Sin.* **2013**, *65*, 513-518. <https://pubmed.ncbi.nlm.nih.gov/24129732/>
10. Lu, X.Y.; Li, Y.H.; Xiao, X.W.; Li, X.B. Inhibitory effects of luteolin on human gastric carcinoma xenografts in nude mice and its mechanism. *Nat. Med. J. China.* **2013**, *93*, 142-146. <https://pubmed.ncbi.nlm.nih.gov/23648354/>

11. Pratheeshkumar, P.; Son, Y.O.; Budhraj, A.; Wang, X.; Ding, S.-Z.; Wang, L.; Hitron, A.; Lee, J.C.; Kim, D.; Divya, S.P.; Chen, G.; Zhang, Z.; Luo, J.; Shi, X.L. Luteolin inhibits human prostate tumor growth by suppressing vascular endothelial growth factor receptor 2-mediated angiogenesis. *PLoS One*. **2012**, *7*, e52279. <https://doi.org/10.1371/journal.pone.0052279>
12. Cai, X.; Lu, W.; Ye, T.; Lu, M.; Wang, J.; Huo, J.; Qian, S.-H.; Wang, X.-N.; Cao, P. The molecular mechanism of luteolin-induced apoptosis is potentially related to inhibition of angiogenesis in human pancreatic carcinoma cells. *Oncol. Rep.* **2012**, *28*, 1353–1361. <https://doi.org/10.3892/or.2012.1914>
13. Li, X.; Chen, M.; Lei, X.; Huang, M.; Ye, W.; Zhang, R.; Zhang, D. Luteolin inhibits angiogenesis by blocking Gas6/Axl signaling pathway. *Int. J. Oncol.* **2017**, *51*, 677–685. <https://doi.org/10.3892/ijo.2017.4041>
14. Fang, B.; Chen, X.; Wu, M.; Kong, H.; Chu, G.; Zhou, Z.; Zhang, C.; Chen, B. Luteolin inhibits angiogenesis of the M2-like TAMs via the downregulation of hypoxia inducible factor-1 $\alpha$  and the STAT3 signalling pathway under hypoxia. *Mol. Med. Rep.* **2018**, *18*, 2914–2922. <https://doi.org/10.3892/mmr.2018.9250>
15. Lamy, S.; Akla, N.; Ouanouki, A.; Lord-Dufour, S.; Beliveau, R. Diet-derived polyphenols inhibit angiogenesis by modulating the interleukin-6/STAT3 pathway. *Exp. Cell Res.* **2012**, *318*, 1586–1596. <https://doi.org/10.1016/j.yexcr.2012.04.004>
16. Song, X.M.; Yao, J.Y.; Wang, F.; Zhou, M.; Zhou, Y.X.; Wang, H.; Wei, L.B.; Zhao, L.; Li, Z.Y.; Lu, N.; Guo, Q. L. Wogonin inhibits tumor angiogenesis via degradation of HIF-1 $\alpha$  protein. *Toxicol. Appl. Pharmacol.* **2013**, *271*, 144–155. <https://doi.org/10.1016/j.taap.2013.04.031>
17. Fu, R.; Chen, Y.; Wang, X.P.; An, T.; Tao, L.; Zhou, Y.X.; Huang, Y.-J.; Chen, B.-A.; Li, Z.Y.; You, Q.D.; Guo, Q.L.; Wu, Z.Q. Wogonin inhibits multiple myeloma-stimulated angiogenesis via the c-Myc/VHL/HIF-1 $\alpha$  signaling axis. *Oncotarget*. **2016**, *7*, 5715–5727. <https://doi.org/10.18632/oncotarget.6796>
18. Lu, N.; Gao, Y.; Ling, Y.; Chen, Y.; Gu, H.Y.; Qi, Q.; Liu, W.; Wang, X.T.; You, Q.D.; Guo, Q.L. Wogonin suppresses tumor growth in vivo and VEGF-induced angiogenesis through inhibiting tyrosine phosphorylation of VEGFR2. *Life Sci.* **2008**, *82*, 956–963. <https://doi.org/10.1016/j.lfs.2008.02.013>
19. Zhou, M.; Song, X.; Huang, Y.; Wei, L.; Li, Z.; You, Q.; Guo, Q.; Lu, N. Wogonin inhibits H<sub>2</sub>O<sub>2</sub>-induced angiogenesis via suppressing the PI3K/Akt/NF- $\kappa$ B signaling pathway. *Vasc. Pharmacol.* **2014**, *60*, 110–119. <https://doi.org/10.1016/j.vph.2014.01.010>
20. Huang, Y.; Zhao, K.; Hu, Y.; Zhou, Y.; Luo, X.; Li, X.; Wei, L.; Li, Z.; You, Q.; Guo, Q.; Lu, N. Wogonoside inhibits angiogenesis in breast cancer via suppressing the Wnt/ $\beta$ -catenin pathway. *Mol. Carcinogen.* **2016**, *55*, 1598–1612. <https://doi.org/10.1002/mc.22412>
21. Kunimasa, K.; Ikekita, M.; Sato, M.; Ohta, T.; Yamori, Y.; Ikeda, M.; Kuranuki, S.; Oikawa, T. Nobiletin, a citrus polymethoxyflavonoid, suppresses multiple angiogenesis-related endothelial cell functions and angiogenesis in vivo. *Cancer Sci.* **2010**, *101*, 2462–2469. <https://doi.org/10.1111/j.1349-7006.2010.01668.x>
22. Chen, J.; Chen, A.Y.; Huang, H.; Ye, X.; Rollyson, W.D.; Perry, H.E.; Brown, K.C.; Rojanasakul, Y.; Rankin, G.O.; Dasgupta, P.; Chen, Y.C. The flavonoid nobiletin inhibits tumor growth and angiogenesis of ovarian cancers via the Akt pathway. *Int. J. Oncol.* **2015**, *46*, 2629–2638. <https://doi.org/10.3892/ijo.2015.2946>
23. Sp, N.; Kang, D.Y.; Joung, Y.H.; Park, J.H.; Kim, W.S.; Lee, H.K.; Song, K.D.; Park, Y.M.; Yang, Y.M. Nobiletin inhibits angiogenesis by regulating Src/FAK/STAT3-mediated signaling through PXN in ER(+) breast cancer cells. *Int. J. Mol. Sci.* **2017**, *18*. <https://doi.org/10.3390/ijms18050935>
24. Gao, Y.; Lu, N.; Ling, Y.; Chen, Y.; Wang, L.; Zhao, Q.; Qi, Q.; Liu, W.; Zhang, H.; You, Q.; Guo, Q. Oroxylin A inhibits angiogenesis through blocking vascular endothelial growth factor-induced KDR/Flk-1 phosphorylation. *J. Cancer Res. Clin.* **2010**, *136*, 667–675. <https://doi.org/10.1007/s00432-009-0705-2>
25. Zhao, K.; Li, X.; Lin, B.; Yang, D.; Zhou, Y.; Li, Z.; Guo, Q.; Lu, N. Oroxyloside inhibits angiogenesis through suppressing internalization of VEGFR2/Flk-1 in endothelial cells. *J. Cell Physiol.* **2018**, *233*, 3454–3464. <https://doi.org/10.1002/jcp.26198>
26. Cathcart, M.C.; Useckaite, Z.; Drakeford, C.; Semik, V.; Lysaght, J.; Gately, K.; O'Byrne, K.J.; Pidgeon, G.P. Anti-cancer effects of baicalein in non-small cell lung cancer in vitro and in vivo. *BMC Cancer.* **2016**, *16*, 1–13. <https://doi.org/10.1186/s12885-016-2740-0>
27. Liu, J.J.; Huang, T.S.; Cheng, W.F.; Lu, F.J. Baicalein and baicalin are potent inhibitors of angiogenesis: Inhibition of endothelial cell proliferation, migration and differentiation. *Int. J. Cancer.* **2003**, *106*, 559–565. <https://doi.org/10.1002/ijc.11267>
28. Chen, J.; Li, Z.; Chen, A.Y.; Ye, X.; Luo, H.; Rankin, G.O.; Chen, Y.C. Inhibitory effect of baicalin and baicalein on ovarian cancer cells. *Int. J. Mol. Sci.* **2013**, *14*, 6012–6025. <https://doi.org/10.3390/ijms14036012>
29. Hwang, K.Y.; Oh, Y.T.; Yoon, H.; Lee, J.; Kim, H.; Choe, W.; Kang, I. Baicalein suppresses hypoxia-induced HIF-1 $\alpha$  protein accumulation and activation through inhibition of reactive oxygen species and PI3-kinase/Akt pathway in BV2 murine microglial cells. *Neurosci. Lett.* **2008**, *444*, 264–269. <https://doi.org/10.1016/j.neulet.2008.08.057>
30. Ling, Y.; Chen, Y.; Chen, P.; Hui, H.; Song, X.; Lu, Z.; Li, C.; Lu, N.; Guo, Q. Baicalein potently suppresses angiogenesis induced by vascular endothelial growth factor through the p53/Rb signaling pathway leading to G1/S cell cycle arrest. *Exp. Biol. Med.* **2011**, *236*, 851–858. <https://doi.org/10.1258/ebm.2011.010395>
31. Ling, Y.; Wang, L.; Chen, Y.; Feng, F.; You, Q.; Lu, N.; Guo, Q. Baicalein inhibits angiogenesis induced by lipopolysaccharide through TRAF6 mediated toll-like receptor 4 pathway. *Biomed. Prev. Nutr.* **2011**, *1*, 172–179. <https://doi.org/10.1016/j.bionut.2011.06.013>

32. Koirala, N. Metabolic engineering of *Escherichia coli* BL21 (DE3) for the production of methylated/glycosylated flavonoids and their biological activities (Doctoral dissertation). **2017**. Sun Moon University, Republic of Korea. <http://archive.nnl.gov.np:8080/handle/123456789/245>
33. Liu, L.Z.; Jing, Y.; Jiang, L.L.; Jiang, X.E.; Jiang, Y.; Rojanasakul, Y.; Jiang, B.H. Acacetin inhibits VEGF expression, tumor angiogenesis and growth through AKT/HIF-1 $\alpha$  pathway. *Biochem. Biophys. Res. Commun.* **2011**, *413*, 299–305. <https://doi.org/10.1016/j.bbrc.2011.08.091>
34. Bhat, T.A.; Nambiar, D.; Tailor, D.; Pal, A.; Agarwal, R.; Singh, R.P. Acacetin inhibits in vitro and in vivo angiogenesis and downregulates STAT signaling and VEGF expression. *Cancer Prev. Res.* **2013**, *6*, 1128–1139. <https://doi.org/10.1158/1940-6207.capr-13-0209>
35. Kim, H.J.; Ahn, M.-R. Apigenin suppresses angiogenesis by inhibiting tube formation and inducing apoptosis. *Nat. Prod. Commun.* **2016**, *11*, 1433–1436. <https://doi.org/10.1177/1934578x1601101005>
36. Fang, J.; Xia, C.; Cao, Z.; Zheng, J.Z.; Reed, E.; Jiang, B.H. Apigenin inhibits VEGF and HIF-1 expression via PI3K/AKT/p70S6K1 and HDM2/p53 pathways. *FASEB J.* **2005**, *19*, 342–353. <https://doi.org/10.1096/fj.04-2175com>
37. Melstrom, L.G.; Salabat, M.R.; Ding, X.Z.; Strouch, M.J.; Grippo, P.J.; Mirzoeva, S.; Pelling, J.C.; Bentrem, D.J. Apigenin down-regulates the hypoxia response genes: HIF-1 $\alpha$ , GLUT-1, and VEGF in human pancreatic cancer cells. *J. Surg. Res.* **2011**, *167*, 173–181. <https://doi.org/10.1016/j.jss.2010.10.041>
38. Shukla, S.; MacLennan, G.T.; Fu, P.; Gupta, S. Apigenin attenuates insulin-like growth factor-I signaling in an autochthonous mouse prostate cancer model. *Pharm. Res.* **2012**, *29*, 1506–1517. <https://doi.org/10.1007/s11095-011-0625-0>
39. Jiang, H.; Wu, D.; Xu, D.; Yu, H.; Zhao, Z.; Ma, D.; Jin, J. Eupafolin exhibits potent anti-angiogenic and antitumor activity in hepatocellular carcinoma. *Int. J. Biol. Sci.* **2017**, *13*, 701–711. <https://doi.org/10.7150/ijbs.17534>
40. de Novais, L.M.; de Arueira, C.C.; Ferreira, L.F.; Ribeiro, T.A.; Sousa Jr, P.T.; Jacinto, M.J.; de Carvalho, M.G.; Judice, W.A.; Jesus, L.O.; de Souza, A.A.; Torquato, H.F. 4'-Hydroxy-6, 7-methylenedioxy-3-methoxyflavone: A novel flavonoid from *Dulacia eglei* with potential inhibitory activity against cathepsins B and L. *Fitoterapia*. **2019**, *132*, 26–29. <https://doi.org/10.1016/j.fitote.2018.08.005>
41. Razak, N.A.; Abu, N.; Ho, W.Y.; Zambari, N.R.; Tan, S.W.; Alitheen, N.B.; Long, K.; Yeap, S.K. Cytotoxicity of eupatorin in MCF-7 and MDA-MB-231 human breast cancer cells via cell cycle arrest, anti-angiogenesis and induction of apoptosis. *Sci. Rep.* **2019**, *9*, 1514. <https://doi.org/10.1038/s41598-018-37796-w>
42. Wang, S.; Yan, Y.; Cheng, Z.; Hu, Y.; Liu, T. Sotetsuflavone suppresses invasion and metastasis in non-small-cell lung cancer A549 cells by reversing EMT via the TNF- $\alpha$ /NF- $\kappa$ B and PI3K/AKT signaling pathway. *Cell Death Discov.* **2018**, *4*, 26. <https://doi.org/10.1038/s41420-018-0026-9>
43. Cheng, Z.K.; Wang, S.H.; Hu, Y.L.; Yan, Y.; Liu, T.X. Effects of sotetsuflavone on expression of endostatin, TGF- $\beta$ , STAT3,  $\beta$ -catenin and ZO-1 in non-small cell lung cancer A549 cells. *TMR Cancer*. **2018**, *1*, 58–65. <https://doi.org/10.53388/tmrc201800030>
44. Gao, L.; Wang, L.; Sun, Z.; Li, H.; Wang, Q.; Yi, C.; Wang, X. Morusin shows potent antitumor activity for human hepatocellular carcinoma in vitro and in vivo through apoptosis induction and angiogenesis inhibition. *Drug Des. Dev. Ther.* **2017**, 1789–1802. <https://doi.org/10.2147/dddt.s138320>
45. Yin, X.L.; Lv, Y.; Wang, S.; Zhang, Y.Q. Morusin suppresses A549 cell migration and induces cell apoptosis by downregulating the expression of COX 2 and VEGF genes. *Oncol. Rep.* **2018**, *40*, 504–510. <https://doi.org/10.3892/or.2018.6431>
46. Guo, Y.; Wang, S.; Hoot, D.R.; Clinton, S.K. Suppression of VEGF-mediated autocrine and paracrine interactions between prostate cancer cells and vascular endothelial cells by soy isoflavones. *J. Nutr. Biochem.* **2007**, *18*, 408–417. <https://doi.org/10.1016/j.jnutbio.2006.08.006>
47. Büchler, P.; Reber, H.A.; Büchler, M.W.; Friess, H.; Lavey, R.S.; Hines, O.J. Antiangiogenic activity of genistein in pancreatic carcinoma cells is mediated by the inhibition of hypoxia-inducible factor-1 and the down-regulation of VEGF gene expression. *Cancer*. **2004**, *100*, 201–210. <https://doi.org/10.1002/cncr.11873>
48. Kim, M.H. Flavonoids inhibit VEGF/bFGF-induced angiogenesis in vitro by inhibiting the matrix-degrading proteases. *J. Cell Biochem.* **2003**, *89*, 529–538. <https://doi.org/10.1002/jcb.10543>
49. Su, S.J.; Yeh, T.M.; Chuang, W.J.; Ho, C.L.; Chang, K.L.; Cheng, H.L.; Liu, H.S.; Cheng, H.L.; Hsu, P.Y.; Chow, N.H. The novel targets for anti-angiogenesis of genistein on human cancer cells. *Biochem. Pharmacol.* **2005**, *69*, 307–318. <https://doi.org/10.1016/j.bcp.2004.09.025>
50. Li, Y.; Sarkar, F.H. Down-regulation of invasion and angiogenesis-related genes identified by cDNA microarray analysis of PC3 prostate cancer cells treated with genistein. *Cancer Lett.* **2002**, *186*, 157–164. [https://doi.org/10.1016/s0304-3835\(02\)00349-x](https://doi.org/10.1016/s0304-3835(02)00349-x)
51. Yu, X.; Zhu, J.; Mi, M.; Chen, W.; Pan, Q.; Wei, M. Anti-angiogenic genistein inhibits VEGF induced endothelial cell activation by decreasing PTK activity and MAPK activation. *Med. Oncol.* **2012**, *29*, 349–357. <https://doi.org/10.1007/s12032-010-9770-2>
52. Pratheeshkumar, P.; Budhraj, A.; Son, Y.O.; Wang, X.; Zhang, Z.; Ding, S.-Z.; Wang, L.; Hitron, A.; Lee, J.C.; Xu, M.; Chen, G.; Luo, J.; Shi, X.L. Quercetin inhibits angiogenesis mediated human prostate tumor growth by targeting VEGFR 2 regulated AKT/mTOR/p70S6K signaling pathways. *PLoS One*. **2012**, *7*, e47516. <https://doi.org/10.1371/journal.pone.0047516>
53. Lai, W.W.; Hsu, S.C.; Chueh, F.S.; Chen, Y.Y.; Yang, J.S.; Lin, J.P.; Lien, J.C.; Tsai, C.H.; Chung, J.G. Quercetin inhibits migration and invasion of SAS human oral cancer cells through inhibition of NF- $\kappa$ B and matrix metalloproteinase-2/-9 signaling pathways. *Anticancer Res.* **2013**, *33*, 1941–1950. <https://pubmed.ncbi.nlm.nih.gov/23645742/>

54. Kong, L.; Wu, K.; Lin, H. Inhibitory effects of quercetin on angiogenesis of experimental mammary carcinoma. *Chin. J. Clin. Oncol.* **2005**, *2*, 631–636. <https://doi.org/10.1007/bf02739722>
55. Yang, F.; Jiang, X.; Song, L.; Wang, H.; Mei, Z.; Xu, Z.; Xing, N. Quercetin inhibits angiogenesis through thrombospondin-1 upregulation to antagonize human prostate cancer PC-3 cell growth in vitro and in vivo. *Oncol. Rep.* **2016**, *35*, 1602–1610. <https://doi.org/10.3892/or.2015.4481>
56. Ansó, E.; Zuazo, A.; Irigoyen, M.; Urdaci, M.C.; Rouzaut, A.; Martínez-Irujo, J.J. Flavonoids inhibit hypoxia-induced vascular endothelial growth factor expression by a HIF-1 independent mechanism. *Biochem. Pharmacol.* **2010**, *79*, 1600–1609. <https://doi.org/10.1016/j.bcp.2010.02.004>
57. Huang, D.Y.; Dai, Z.R.; Li, W.-M.; Wang, R.G.; Yang, S.M. Inhibition of EGF expression and NF- $\kappa$ B activity by treatment with quercetin leads to suppression of angiogenesis in nasopharyngeal carcinoma. *Saudi. J. Biol. Sci.* **2018**, *25*, 826–831. <https://doi.org/10.1016/j.sjbs.2016.11.011>
58. Jackson, S.J.; Venema, R.C. Quercetin inhibits eNOS, microtubule polymerization, and mitotic progression in bovine aortic endothelial cells. *J. Nutr.* **2006**, *136*, 1178–1184. <https://doi.org/10.1093/jn/136.5.1178>
59. Xiao, X.; Shi, D.; Liu, L.; Wang, J.; Xie, X.; Kang, T.; Deng, W. Quercetin suppresses cyclooxygenase-2 expression and angiogenesis through inactivation of P300 signaling. *PLoS One.* **2011**, *6*, e22934. <https://doi.org/10.1371/journal.pone.0022934>
60. Lin, C.; Wu, M.; Dong, J. Quercetin-4'-O- $\beta$ -D-glucopyranoside (QODG) inhibits angiogenesis by suppressing VEGFR2-mediated signaling in zebrafish and endothelial cells. *PLoS One.* **2012**, *7*, e31708. <https://doi.org/10.1371/journal.pone.0031708>
61. Singh, R.P.; Tyagi, A.; Sharma, G.; Mohan, S.; Agarwal, R. Oral silibinin inhibits in vivo human bladder tumor xenograft growth involving down-regulation of survivin. *Clin. Cancer Res.* **2008**, *14*, 300–308. <https://doi.org/10.1158/1078-0432.ccr-07-1565>
62. Yang, S.-H.; Lin, J.K.; Huang, C.J.; Chen, W.S.; Li, S.Y.; Chiu, J.H. Silibinin inhibits angiogenesis via Flt-1, but not KDR, receptor up-regulation. *J. Surg. Res.* **2005**, *128*, 140–146. <https://doi.org/10.1016/j.jss.2005.04.042>
63. Singh, R.P.; Sharma, G.; Dhanalakshmi, S.; Agarwal, C.; Agarwal, R. Suppression of advanced human prostate tumor growth in athymic mice by silibinin feeding is associated with reduced cell proliferation, increased apoptosis, and inhibition of angiogenesis. *Cancer Epidem. Biomar.* **2003**, *12*, 933–939. <https://pubmed.ncbi.nlm.nih.gov/14504208/>
64. Gu, M.; Singh, R.P.; Dhanalakshmi, S.; Agarwal, C.; Agarwal, R. Silibinin inhibits inflammatory and angiogenic attributes in photocarcinogenesis in SKH-1 hairless mice. *Cancer Res.* **2007**, *67*, 3483–3491. <https://doi.org/10.1158/0008-5472.can-06-3955>
65. Singh, R.P.; Raina, K.; Sharma, G.; Agarwal, R. Silibinin inhibits established prostate tumor growth, progression, invasion, and metastasis and suppresses tumor angiogenesis and epithelial-mesenchymal transition in transgenic adenocarcinoma of the mouse prostate model mice. *Clin. Cancer Res.* **2008**, *14*, 7773–7780. <https://doi.org/10.1158/1078-0432.ccr-08-1309>
66. Singh, R.P.; Gu, M.; Agarwal, R. Silibinin inhibits colorectal cancer growth by inhibiting tumor cell proliferation and angiogenesis. *Cancer Res.* **2008**, *68*, 2043–2050. <https://doi.org/10.1158/0008-5472.can-07-6247>
67. Singh, R.P.; Dhanalakshmi, S.; Agarwal, C.; Agarwal, R. Silibinin strongly inhibits growth and survival of human endothelial cells via cell cycle arrest and downregulation of survivin, Akt and NF- $\kappa$ B: implications for angioprevention and antiangiogenic therapy. *Oncogene.* **2005**, *24*, 1188–1202. <https://doi.org/10.1038/sj.onc.1208276>
68. García-Maceira, P.; Mateo, J. Silibinin inhibits hypoxia-inducible factor-1 $\alpha$  and mTOR/p70S6K/4E-BP1 signaling pathway in human cervical and hepatoma cancer cells: implications for anticancer therapy. *Oncogene.* **2009**, *28*, 313. <https://doi.org/10.1038/onc.2008.398>
69. Kim, S.; Choi, J.H.; Lim, H.I.; Lee, S.K.; Kim, W.W.; Kim, J.S.; Kim, J.H.; Choe, J.H.; Yang, J.H.; Nam, S.J.; Lee, J.E. Silibinin prevents TPA-induced MMP-9 expression and VEGF secretion by inactivation of the Raf/MEK/ERK pathway in MCF-7 human breast cancer cells. *Phytomedicine.* **2009**, *16*, 573–580. <https://doi.org/10.1016/j.phymed.2008.11.006>
70. Jung, S.K.; Lee, K.W.; Byun, S.; Lee, E.J.; Kim, J.E.; Bode, A.M.; Dong, Z.; Lee, H.J. Myricetin inhibits UVB-induced angiogenesis by regulating PI-3 kinase in vivo. *Carcinogenesis.* **2010**, *31*, 911–917. <https://doi.org/10.1093/carcin/bgp221>
71. Huang, H.; Chen, A.Y.; Rojanasakul, Y.; Ye, X.; Rankin, G.O.; Chen, Y.C. Dietary compounds galangin and myricetin suppress ovarian cancer cell angiogenesis. *J. Funct. Foods.* **2015**, *15*, 464–475. <https://doi.org/10.1016/j.jff.2015.03.051>
72. Kim, G.D. Myricetin inhibits angiogenesis by inducing apoptosis and suppressing PI3K/Akt/mTOR signaling in endothelial cells. *J. Cancer Prev.* **2017**, *22*, 219–227. <https://doi.org/10.15430/jcp.2017.22.4.219>
73. Luo, H.; Rankin, G.O.; Juliano, N.; Jiang, B.H.; Chen, Y.C. Kaempferol inhibits VEGF expression and in vitro angiogenesis through a novel ERK-NF $\kappa$ B-cMyc-p21 pathway. *Food Chem.* **2012**, *130*, 321–328. <https://doi.org/10.1016/j.foodchem.2011.07.045>
74. Luo, H.; Rankin, G.O.; Liu, L.; Daddysman, M.K.; Jiang, B.H.; Chen, Y.C. Kaempferol inhibits angiogenesis and VEGF expression through both HIF dependent and independent pathways in human ovarian cancer cells. *Nutr. Cancer.* **2009**, *61*, 554–563. <https://doi.org/10.1080/01635580802666281>
75. Liang, F.; Han, Y.; Gao, H.; Xin, S.; Chen, S.; Wang, N.; Qin, W.; Zhong, H.; Lin, S.; Yao, X.; Li, S. Kaempferol identified by zebrafish assay and fine fractionations strategy from *dysosma versipellis* inhibits angiogenesis through VEGF and FGF pathways. *Sci. Rep.* **2015**, *5*, 14468. <https://doi.org/10.1038/srep14468>
76. Chin, H.K.; Horng, C.T.; Liu, Y.S.; Lu, C.C.; Su, C.Y.; Chen, P.S.; Chiu, H.Y.; Tsai, F.J.; Shieh, P.C.; Yang, J.S. Kaempferol inhibits angiogenic ability by targeting VEGF receptor-2 and downregulating the PI3K/AKT, MEK and ERK pathways in VEGF-stimulated human umbilical vein endothelial cells. *Oncol. Rep.* **2018**, *39*, 2351–2357. <https://doi.org/10.3892/or.2018.6312>

77. Kim, G.D. Kaempferol Inhibits Angiogenesis by Suppressing HIF-1 $\alpha$  and VEGFR2 Activation via ERK/p38 MAPK and PI3K/Akt/mTOR Signaling Pathways in Endothelial Cells. *Prev. Nutr. Food Sci.* **2017**, *22*, 320-326. <https://doi.org/10.3746/pnf.2017.22.4.320>
78. Yu, Y.; Zhou, X.Z.; Ye, L.; Yuan, Q.; Freeberg, S.; Shi, C.; Zhu, P.W.; Bao, J.; Jiang, N.; Shao, Y. Rhamnazin attenuates inflammation and inhibits alkali burn-induced corneal neovascularization in rats. *RSC Adv.* **2018**, *8*, 26696-26706. <https://doi.org/10.1039/c8ra03159b>
79. Yu, Y.; Cai, W.; Pei, C.G.; Shao, Y. Rhamnazin, a novel inhibitor of VEGFR2 signaling with potent antiangiogenic activity and antitumor efficacy. *Biochem. Biophys. Res. Commun.* **2015**, *458*, 913-919. <https://doi.org/10.1016/j.bbrc.2015.02.059>
80. Chen, D.; Li, D.; Xu, X.B.; Qiu, S.; Luo, S.; Qiu, E.; Rong, Z.; Zhang, J.; Zheng, D. Galangin inhibits epithelial-mesenchymal transition and angiogenesis by downregulating CD44 in glioma. *J. Cancer.* **2019**, *10*, 4499. <https://doi.org/10.7150/jca.31487>
81. Park, J.H.; Jang, Y.J.; Choi, Y.J.; Jang, J.W.; Kim, J.H.; Rho, Y.K.; Kim, I.J.; Kim, H.J.; Leem, M.J.; Lee, S.T. Fisetin inhibits matrix metalloproteinases and reduces tumor cell invasiveness and endothelial cell tube formation. *Nutr. Cancer.* **2013**, *65*, 1192-1199. <https://doi.org/10.1080/01635581.2013.828090>
82. Arowosegbe, M.A.; Ogunleye, A.J.; Eniafe, G.O.; Omotuyi, O.I.; Ehima, V.O.; Metibemu, D.S.; Ogungbe, B.; Kanmodi, R.I.; Ogunmola, O.J. Applications of in silico methodologies in exploring the inhibitory potentials of fisetin on MMP-8 and MMP-13 in colorectal cancer progression. *Int. J. Drug Dev. Res.* **2017**, *9*, 09-15. [https://scholar.google.com/scholar?cluster=15226939542408094674&hl=en&as\\_sdt=2005&sciodt=0,5](https://scholar.google.com/scholar?cluster=15226939542408094674&hl=en&as_sdt=2005&sciodt=0,5)
83. Bhat, T.A.; Nambiar, D.; Pal, A.; Agarwal, R.; Singh, R.P. Fisetin inhibits various attributes of angiogenesis in vitro and in vivo—implications for angioprevention. *Carcinogenesis.* **2012**, *33*, 385-393. <https://doi.org/10.1093/carcin/bgr282>
84. Park, J.H.; Jang, Y.J.; Choi, Y.J.; Jang, J.W.; Kim, J.H.; Rho, Y.K.; Lee, S.T. Fisetin inhibits matrix metalloproteinases and reduces tumor cell invasiveness and endothelial cell tube formation. *Nutr. Cancer.* **2013**, *65*, 1192-1199. <https://doi.org/10.1080/01635581.2013.828090>
85. Tsai, C.F.; Chen, J.H.; Chang, C.N.; Lu, D.Y.; Chang, P.C.; Wang, S.L.; Yeh, W.L. Fisetin inhibits cell migration via inducing HO-1 and reducing MMPs expression in breast cancer cell lines. *Food Chem. Toxicol.* **2018**, *120*, 528-535. <https://doi.org/10.1016/j.fct.2018.07.059>
86. Chien, C.-S.; Shen, K.-H.; Huang, J.-S.; Ko, S.-C.; Shih, Y.-W. Antimetastatic potential of fisetin involves inactivation of the PI3K/Akt and JNK signaling pathways with downregulation of MMP-2/9 expressions in prostate cancer PC-3 cells. *Mol. Cell. Biochem.* **2009**, *333*, 169-180. <https://doi.org/10.1007/s11010-009-0217-z>
87. Chou, R.H.; Hsieh, S.C.; Yu, Y.L.; Huang, M.H.; Huang, Y.C.; Hsieh, Y.H. Fisetin inhibits migration and invasion of human cervical cancer cells by down-regulating urokinase plasminogen activator expression through suppressing the p38 MAPK-dependent NF- $\kappa$ B signaling pathway. *PLoS One.* **2013**, *8*, e71983. <https://doi.org/10.1371/journal.pone.0071983>
88. Murtaza, I.; Adhami, V.M.; Hafeez, B.B.; Saleem, M.; Mukhtar, H. Fisetin, a natural flavonoid, targets chemoresistant human pancreatic cancer AsPC-1 cells through DR3-mediated inhibition of NF- $\kappa$ B. *Int. J. Cancer.* **2009**, *125*, 2465-2473. <https://doi.org/10.1002/ijc.24628>
89. Basse`res D.S.; Baldwin A.S. Nuclear factor-kappaB and inhibitor of kappaB kinase pathways in oncogenic initiation and progression. *Oncogene.* **2006**, *25*, 6817-6830. <https://doi.org/10.1038/sj.onc.1209942>
90. N Syed, D.; M Adhami, V.; Imran Khan, M.; Mukhtar, H. Inhibition of Akt/mTOR signaling by the dietary flavonoid fisetin. *Anti-Cancer Agents Med. Chem.* **2013**, *13*, 995-1001. <https://doi.org/10.2174/18715206113139990129>
91. Aksamitiene, E.; Kiyatkin, A.; Kholodenko, B.N. Cross-talk between mitogenic Ras/MAPK and survival PI3K/Akt pathways: A fine balance. *Biochem. Soc. Trans.* **2012**, *40*, 139-146. <https://doi.org/10.1042/bst20110609>
92. Meng, F.; Abedini, A.; Plesner, A.; Verchere, C.B.; Raleigh, D.P. The flavanol (-)-epigallocatechin 3-gallate inhibits amyloid formation by islet amyloid polypeptide, disaggregates amyloid fibrils, and protects cultured cells against IAPP-induced toxicity. *Biochemistry.* **2010**, *49*, 8127-8133. <https://doi.org/10.1021/bi100939a>
93. Moyle, C.W.; Cerezo, A.B.; Winterbone, M.S.; Hollands, W.J.; Alexeev, Y.; Needs, P.W.; Kroon, P.A. Potent inhibition of VEGFR-2 activation by tight binding of green tea epigallocatechin gallate and apple procyanidins to VEGF: Relevance to angiogenesis. *Mol. Nutr. Food Res.* **2015**, *59*, 401-412. <https://doi.org/10.1002/mnfr.201400478>
94. Neuhaus, T.; Pabst, S.; Stier, S.; Weber, A.A.; Schrör, K.; Sachinidis, A.; Vetter, H.; Ko, Y.D. Inhibition of the vascular-endothelial growth factor-induced intracellular signaling and mitogenesis of human endothelial cells by epigallocatechin-3 gallate. *Eur. J. Pharmacol.* **2005**, *483*, 223-227. <https://doi.org/10.1016/j.ejphar.2003.10.029>
95. Fassina, G.; Vene, R.; Morini, M.; Minghelli, S.; Benelli, R.; Noonan, D.M.; Albini, A. Mechanisms of inhibition of tumor angiogenesis and vascular tumor growth by epigallocatechin-3-gallate. *Clin. Cancer Res.* **2004**, *10*, 4865-4873. <https://doi.org/10.1158/1078-0432.ccr-03-0672>
96. Zhou, F.; Zhou, H.; Wang, T.; Mu, Y.; Wu, B.; Guo, D.L.; Zhang, X.M.; Wu, Y.. Epigallocatechin-3-gallate inhibits proliferation and migration of human colon cancer SW620 cells in vitro. *Acta Pharmacol. Sin.* **2012**, *33*, 120-126. <https://doi.org/10.1038/aps.2011.139>
97. Sakamoto, Y.; Terashita, N.; Muraguchi, T.; Fukusato, T.; Kubota, S. Effects of epigallocatechin-3-gallate (EGCG) on A549 lung cancer tumor growth and angiogenesis. *Biosci. Biotechnol. Biochem.* **2013**, *77*, 1799-1803. <https://doi.org/10.1271/bbb.120882>
98. Shimizu, M.; Shirakami, Y.; Sakai, H.; Yasuda, Y.; Kubota, M.; Adachi, S.; Tsurumi, H.; Hara, Y.; Moriwaki, H. (-)-Epigallocatechin gallate inhibits growth and activation of the VEGF/VEGFR axis in human colorectal cancer cells. *Chem. Biol. Interact.* **2010**, *185*, 247-252. <https://doi.org/10.1016/j.cbi.2010.03.036>

99. He, L.; Zhang, E.; Shi, J.; Li, X.; Zhou, K.; Zhang, Q.; Le, A.D.; Tang, X. (-)-Epigallocatechin-3-gallate inhibits human papillomavirus (HPV)-16 oncoprotein-induced angiogenesis in non-small cell lung cancer cells by targeting HIF-1 $\alpha$ . *Cancer Chemother. Pharmacol.* **2013**, *71*, 713–725. <https://doi.org/10.1007/s00280-012-2063-z>
100. Zhu, B.H.; Chen, H.Y.; Zhan, W.H.; Wang, C.Y.; Cai, S.R.; Wang, Z.; Zhang, C.H.; He, Y.L. (-)-Epigallocatechin-3-gallate inhibits VEGF expression induced by IL-6 via Stat3 in gastric cancer. *World J. Gastroenterol.* **2011**, *17*, 2315–2325. <https://doi.org/10.3748/wjg.v17.i18.2315>
101. (154) Zhu, B.H.; Zhan, W.H.; Li, Z.R.; Wang, Z.; He, Y.L.; Peng, J.S.; Cai, S.R.; Ma, J.P.; Zhang, C.H. (-)-Epigallocatechin-3-gallate inhibits growth of gastric cancer by reducing VEGF production and angiogenesis. *World J. Gastroenterol.* **2007**, *13*, 1162. <https://doi.org/10.3748/wjg.v13.i8.1162>
102. Shi, J.L.; Liu, F.; Zhang, W.Z.; Liu, X.; Lin, B.H.; Tang, X.D. Epigallocatechin-3-gallate inhibits nicotine-induced migration and invasion by the suppression of angiogenesis and epithelial-mesenchymal transition in non-small cell lung cancer cells. *Oncol. Rep.* **2015**, *33*, 2972–2980. <https://doi.org/10.3892/or.2015.3889>
103. Siddiqui, I.A.; Malik, A.; Adhami, V.M.; Asim, M.; Hafeez, B.B.; Sarfaraz, S.; Mukhtar, H. (2008). Green tea polyphenol EGCG sensitizes human prostate carcinoma LNCaP cells to TRAIL-mediated apoptosis and synergistically inhibits biomarkers associated with angiogenesis and metastasis. *Oncogene*. **2008**, *27*, 2055–2063. <https://doi.org/10.1038/sj.onc.1210840>
104. Chen, C.Y.; Lin, Y.J.; Wang, C.C.N.; Lan, Y.H.; Lan, S.J.; Sheu, M.J. Epigallocatechin-3-gallate inhibits tumor angiogenesis: involvement of endoglin/Smad1 signaling in human umbilical vein endothelium cells. *Biomed. Pharmacother.* **2019**, *120*, 109491. <https://doi.org/10.1016/j.biopha.2019.109491>
105. Tudoran, O.; Soritau, O.; Balacescu, O.; Balacescu, L.; Braicu, C.; Rus, M.; Gherman, C.; Virag, P.; Irimie, F.; Berindan-Neagoe, I. Early transcriptional pattern of angiogenesis induced by EGCG treatment in cervical tumour cells. *J. Cell. Mol. Med.* **2012**, *16*, 520–530. <https://doi.org/10.1111/j.1582-4934.2011.01346.x>
106. Ohga, N.; Hida, K.; Hida, Y.; Muraki, C.; Tsuchiya, K.; Matsuda, K.; Ohiro, Y.; Totsuka, Y.; Shindoh, M. Inhibitory effects of epigallocatechin-3 gallate, a polyphenol in green tea, on tumor-associated endothelial cells and endothelial progenitor cells. *Cancer Sci.* **2009**, *100*, 1963–1970. <https://doi.org/10.1111/j.1349-7006.2009.01255.x>
107. Neuhaus, T.; Pabst, S.; Stier, S.; Weber, A.A.; Schrör, K.; Sachinidis, A.; Vetter, H.; Ko, Y.D. Inhibition of the vascular-endothelial growth factor-induced intracellular signaling and mitogenesis of human endothelial cells by epigallocatechin-3 gallate. *Eur. J. Pharmacol.* **2004**, *483*, 223–227. <https://doi.org/10.1016/j.ejphar.2003.10.029>
108. Gu, J.W.; Makey, K.L.; Tucker, K.B.; Chinchar, E.; Mao, X.; Pei, I.; Thomas, E.Y.; Miele, L. EGCG, a major green tea catechin suppresses breast tumor angiogenesis and growth via inhibiting the activation of HIF-1 $\alpha$  and NF $\kappa$ B, and VEGF expression. *Vasc. Cell.* **2013**, *5*, 1–10. <https://doi.org/10.1186/2045-824x-5-9>
109. Li, X.; Feng, Y.; Liu, J.; Feng, X.; Zhou, K.; Tang, X. (2013). Epigallocatechin-3-gallate inhibits IGF-I-stimulated lung cancer angiogenesis through downregulation of HIF-1 $\alpha$  and VEGF expression. *J. Nutrigenet. Nutrige.* **2013**, *6*, 169–178. <https://doi.org/10.1159/000354402>
110. Yamakawa, S.; Asai, T.; Uchida, T.; Matsukawa, M.; Akizawa, T.; Oku, N. (-)-Epigallocatechin gallate inhibits membrane-type 1 matrix metalloproteinase, MT1-MMP, and tumor angiogenesis. *Cancer Lett.* **2004**, *210*, 47–55. <https://doi.org/10.1016/j.canlet.2004.03.008>
111. Garbisa, S.; Sartor, L.; Biggin, S.; Salvato, B.; Benelli, R.; Albini, A. Tumor gelatinases and invasion inhibited by the green tea flavanol epigallocatechin-3-gallate. *Cancer*. **2001**, *91*, 822–832. [https://doi.org/10.1002/1097-0142\(20010215\)91:4<822::aid-cnrc1070>3.0.co;2-g](https://doi.org/10.1002/1097-0142(20010215)91:4<822::aid-cnrc1070>3.0.co;2-g)
112. Wang, J.; Man, G.C.W.; Chan, T.H.; Kwong, J.; Wang, C.C. A prodrug of green tea polyphenol (-)-epigallocatechin-3-gallate (Pro-EGCG) serves as a novel angiogenesis inhibitor in endometrial cancer. *Cancer Lett.* **2018**, *412*, 10–20. <https://doi.org/10.1016/j.canlet.2017.09.054>
113. Li, Q.; Wang, Y.; Zhang, L.; Chen, L.; Du, Y.; Ye, T.; Shi, X. Naringenin exerts anti-angiogenic effects in human endothelial cells: Involvement of ER $\alpha$ /VEGF/KDR signaling pathway. *Fitoterapia.* **2016**, *111*, 78–86. <https://doi.org/10.1016/j.fitote.2016.04.015>
114. Lowe, H.I.; Toyang, N.J.; Watson, C.T.; Ayeah, K.N.; Bryant, J. HLBT-100: a highly potent anti-cancer flavanone from *Tillandsia recurvata* (L.) L. *Cancer Cell Int.* **2017**, *17*, 1–12. <https://doi.org/10.1186/s12935-017-0404-z>
115. Kim, G.D. Hesperetin inhibits vascular formation by suppressing of the PI3K/AKT, ERK, and p38 MAPK signaling pathways. *Prev. Nutr. Food Sci.* **2014**, *19*, 299–306. <https://doi.org/10.3746/pnf.2014.19.4.299>
116. Nalini, N.; Aranganathan, S.; Kabalimurthy, J. Chemopreventive efficacy of hesperetin (citrus flavonone) against 1,2-dimethylhydrazine-induced rat colon carcinogenesis. *Toxicol. Mech. Methods.* **2012**, *22*, 397–408. <https://doi.org/10.3109/15376516.2012.673092>
117. Shukla, K.; Sonowal, H.; Saxena, A.; Ramana, K.V. Didymnin by suppressing NF- $\kappa$ B activation prevents VEGF-induced angiogenesis in vitro and in vivo. *Vascul. Pharmacol.* **2019**, *115*, 18–25. <https://doi.org/10.1016/j.vph.2019.01.002>
118. Dai, F.; Gao, L.; Zhao, Y.; Wang, C.; Xie, S. Farrerol inhibited angiogenesis through Akt/mTOR, Erk and Jak2/Stat3 signal pathway. *Phytomedicine.* **2016**, *23*, 686–693. <https://doi.org/10.1016/j.phymed.2016.03.008>
119. Xi, S.Y.; Zhang, Q.; Liu, C.Y.; Xie, H.; Yue, L.F.; Gao, X.M. (2012). Effects of hydroxy safflower yellow-A on tumor capillary angiogenesis in transplanted human gastric adenocarcinoma BGC-823 tumors in nude mice. *J. Tradit. Chin. Med.* **2012**, *32*, 243–248. [https://doi.org/10.1016/s0254-6272\(13\)60019-9](https://doi.org/10.1016/s0254-6272(13)60019-9)

120. Xi, S.Y.; Zhang, Q.; Xie, H.; Liu, L.; Liu, C.; Gao, X.; Zhang, J.; Wu, L.; Qian, L.; Deng, X. Effects of hydroxy safflor yellow A on blood vessel and mRNA expression with VEGF and bFGF of transplantation tumor with gastric adenocarcinoma cell line BGC-823 in nude mice. *China J. Chinese Mater. Med.* **2009**, *34*, 605–610. <https://doi.CNKI:SUN:ZGZY.0.2009-05-028>
121. Xi, S.; Zhang, Q.; Liu, C.; Xie, H.; Yue, L.; Zhao, Y.; Zang, B.; Gao, X. Effects of HSYA on expression of bFGF protein and MMP-9 in BGC-823 transplantation tumor of nude mice. *China J. Chinese Mater. Med.* **2010**, *35*, 2877–2881. <https://doi.org/10.4268/cjcmm20102119>
122. Yang, F.; Li, J.; Zhu, J.; Wang, D.; Chen, S.; Bai, X. Hydroxysafflor yellow A inhibits angiogenesis of hepatocellular carcinoma via blocking ERK/MAPK and NF- $\kappa$ B signaling pathway in H22 tumor-bearing mice. *Eur. J. Pharmacol.* **2015**, *754*, 105–114. <https://doi.org/10.1016/j.ejphar.2015.02.015>
123. Zhang, J.; Li, J.; Song, H.; Xiong, Y.; Liu, D.; Bai, X. Hydroxysafflor yellow A suppresses angiogenesis of hepatocellular carcinoma through inhibition of p38 MAPK phosphorylation. *Biomed. Pharmacother.* **2019**, *109*, 806–814. <https://doi.org/10.1016/j.biopha.2018.09.086>
124. Wang, C.; Li, Y.; Chen, H.; Zhang, J.; Zhang, J.; Qin, T.; Duan, C.; Chen, X.; Liu, Y.; Zhou, X.; Yang, J. Inhibition of CYP4A by a novel flavonoid FLA-16 prolongs survival and normalizes tumor vasculature in glioma. *Cancer Lett.* **2017**, *402*, 131–141. <https://doi.org/10.1016/j.canlet.2017.05.030>
125. Wang, J.; Yang, Z.; Wen, J.; Ma, F.; Wang, F.; Yu, K.; Tang, M.; Wu, W.; Dong, Y.; Cheng, X.; Nie, C. SKLB-M8 induces apoptosis through the AKT/mTOR signaling pathway in melanoma models and inhibits angiogenesis with a decrease of ERK1/2 phosphorylation. *J. Pharmacol. Sci.* **2014**, *126*, 198–207. <https://doi.org/10.1254/jphs.14077fp>
126. Kim, Y.H.; Shin, E.K.; Kim, D.H.; Lee, H.H.; Park, J.H.Y.; Kim, J.K. Antiangiogenic effect of licochalcone A. *Biochem. Pharmacol.* **2010**, *80*, 1152–1159. <https://doi.org/10.1016/j.bcp.2010.07.006>
127. Kwon, S.J.; Park, S.Y.; Kwon, G.T.; Lee, K.W.; Kang, Y.H.; Choi, M.S.; Yun, J.W.; Jeon, J.H.; Jun, J.G.; Park, J.H. Licochalcone E present in licorice suppresses lung metastasis in the 4T1 mammary orthotopic cancer model. *Cancer Prev. Res.* **2013**, *6*, 603–613. <https://doi.org/10.1158/1940-6207.capr-13-0012>
128. Abu, N.; Mohamed, N.E.; Yeap, S.K.; Lim, K.L.; Akhtar, M.N.; Zulfadli, A.J.; Kee, B.B.; Abdullah, M.P.; Omar, A.R.; Alitheen, N.B. In vivo antitumor and antimetastatic effects of flavokawain B in 4T1 breast cancer cell-challenged mice. *Drug Des. Devel. Ther.* **2015**, *9*, 1401–1417. <https://doi.org/10.2147/dddt.s67976>
129. Abu, N.; Akhtar, M.N.; Yeap, S.K.; Lim, K.L.; Ho, W.Y.; Abdullah, M.P.; Ho, C.L.; Omar, A.R.; Ismail, J.; Alitheen, N.B. Flavokawain B induced cytotoxicity in two breast cancer cell lines, MCF-7 and MDA-MB231 and inhibited the metastatic potential of MDA-MB231 via the regulation of several tyrosine kinases in vitro. *BMC Complement. Altern. Med.* **2016**, *16*, 1–14. <https://doi.org/10.1186/s12906-016-1046-8>
130. Abu, N.; Akhtar, M.N.; Yeap, S.K.; Lim, K.L.; Ho, W.Y.; Zulfadli, A.J.; Omar, A.R.; Sulaiman, M.R.; Abdullah, M.P.; Alitheen, N.B. Flavokawain A induces apoptosis in MCF-7 and MDA-MB231 and inhibits the metastatic process in vitro. *PLoS One.* **2014**, *9*, e105244. <https://doi.org/10.1371/journal.pone.0105244>
131. Liu, Z.; Xu, X.; Li, X.; Liu, S.; Simoneau, A.R.; He, F.; Wu, X.R.; Zi, X. Kava chalcone, flavokawain A, inhibits urothelial tumorigenesis in the UPII-SV40T transgenic mouse model. *Cancer Prev. Res.* **2013**, *6*, 1365–1375. <https://doi.org/10.1158/1940-6207.22524197.v1>
132. Xue, Z.G.; Niu, P.G.; Shi, D.H.; Liu, Y.; Deng, J.; Chen, Y.Y. Cardamonin inhibits angiogenesis by mTOR downregulation in SKOV3 cells. *Planta Med.* **2016**, *82*, 70–75. <https://doi.org/10.1055/s-0035-1557901>
133. Tian, S.S.; Jiang, F.S.; Zhang, K.; Zhu, X.X.; Jin, B.; Lu, J.J.; Ding, Z.S. Flavonoids from the leaves of *Carya cathayensis* Sarg. inhibit vascular endothelial growth factor-induced angiogenesis. *Fitoterapia.* **2014**, *92*, 34–40. <https://doi.org/10.1016/j.fitote.2013.09.016>
134. Jiang, F.S.; Tian, S.S.; Lu, J.J.; Ding, X.H.; Qian, C.D.; Ding, B.; Ding, Z.S.; Jin, B. Cardamonin regulates miR-21 expression and suppresses angiogenesis induced by vascular endothelial growth factor. *BioMed. Res. Int.* **2015**, *1*, 1–8. <https://doi.org/10.1155/2015/501581>
135. Kang, S.W.; Choi, J.S.; Choi, Y.J.; Bae, J.Y.; Li, J.; Kim, D.S.; Kim, J.L.; Shin, S.Y.; Lee, Y.J.; Kwun, I.S.; Kang, Y.H. Licorice isoliquiritigenin dampens angiogenic activity via inhibition of MAPK-responsive signaling pathways leading to induction of matrix metalloproteinases. *J. Nutr. Biochem.* **2010**, *21*, 55–65. <https://doi.org/10.1016/j.jnutbio.2008.10.004>
136. Wang, Z.; Wang, N.; Han, S.; Wang, D.; Mo, S.; Yu, L. Dietary compound isoliquiritigenin inhibits breast cancer neoangiogenesis via VEGF/VEGFR-2 signaling pathway. *PLoS One.* **2013**, *8*, e68566. <https://doi.org/10.1371/journal.pone.0068566>
137. Sun, Z.J.; Chen, G.; Zhang, W.; Hu, X.; Huang, C.F.; Wang, Y.F.; Jia, J.; Zhao, Y.F. Mammalian target of rapamycin pathway promotes tumor-induced angiogenesis in adenoid cystic carcinoma: its suppression by isoliquiritigenin through dual activation of c-Jun NH2-terminal kinase and inhibition of extracellular signal-regulated kinase. *J. Pharmacol. Exp. Ther.* **2010**, *334*, 500–512. <https://doi.org/10.1124/jpet.110.167692>
138. He, W.; Li, Y. Phytochemical isoliquiritigenin inhibits angiogenesis ex vivo and corneal neovascularization in mice. *Altern. Integr. Med.* **2014**, *3*, 176. <https://doi.org/10.4172/2327-5162.1000176>
139. Jhanji, V.; Liu, H.; Law, K.; Lee, V.Y.-W.; Huang, S.-F.; Pang, C.-P.; Yam, G.H.-F. Isoliquiritigenin from licorice root suppressed neovascularization in experimental ocular angiogenesis models. *Brit. J. Ophthalmol.* **2011**, *95*, 1309–1315. <https://doi.org/10.1136/bjophthalmol-2011-300110>



140. Lee, S.A.; Lee, M.; Ryu, H.; Kwak, T.; Kim, H.; Kang, M.; Jung, O.; Kim, H.; Park, K.; Lee, J. Differential inhibition of transmembrane 4 L six family member 5 (TM4SF5)-mediated tumorigenesis by TSAHC and sorafenib. *Cancer Biol. Ther.* **2011**, *11*, 330–336. <https://doi.org/10.4161/cbt.11.3.14099>
141. Negrão, R.; Incio, J.; Lopes, R.; Azevedo, I.; Soares, R. Evidence for the effects of xanthohumol in disrupting angiogenic, but not stable vessels. *Int. J. Biomed. Sci.* **2007**, *3*, 279. <https://doi.org/10.59566/ijbs.2007.3279>
142. Monteiro, R.; Calhau, C.; Silva, A.O.E.; Pinheiro-Silva, S.; Guerreiro, S.; Gärtner, F.; Azevedo, I.; Soares, R. Xanthohumol inhibits inflammatory factor production and angiogenesis in breast cancer xenografts. *J. Cell. Biochem.* **2008**, *104*, 1699–1707. <https://doi.org/10.1002/jcb.21738>
143. Gallo, C.; Dallaglio, K.; Bassani, B.; Rossi, T.; Rossello, A.; Noonan, D.M.; D'Uva, G.; Bruno, A.; Albini, A. Hop derived flavonoid xanthohumol inhibits endothelial cell functions via AMPK activation. *Oncotarget* **2016**, *7*, 59917. <https://doi.org/10.18632/oncotarget.10990>
144. Dell'Eva, R.; Ambrosini, C.; Vannini, N.; Piaggio, G.; Albini, A.; Ferrari, N. AKT/NF- $\kappa$ B inhibitor xanthohumol targets cell growth and angiogenesis in hematologic malignancies. *Cancer* **2007**, *110*, 2007–2011. <https://doi.org/10.1002/cncr.23017>
145. Albini, A.; Dell'Eva, R.; Vené, R.; Ferrari, N.; Buhler, D.R.; Noonan, D.M.; Fassina, G. Mechanisms of the antiangiogenic activity by the hop flavonoid xanthohumol: NF- $\kappa$ B and Akt as targets. *FASEB J.* **2006**, *20*, 527–529. <https://doi.org/10.1096/fj.05-5128fje>
146. Harikumar, K.B.; Kunnumakkara, A.B.; Ahn, K.S.; Anand, P.; Krishnan, S.; Guha, S.; Aggarwal, B.B. Modification of the cysteine residues in I $\kappa$ B $\alpha$  kinase and NF- $\kappa$ B (p65) by xanthohumol leads to suppression of NF- $\kappa$ B-regulated gene products and potentiation of apoptosis in leukemia cells. *Blood, J. Am. Soc. Hematol.* **2009**, *113*, 2003–2013. <https://doi.org/10.1182/blood-2008-04-151944>
147. Saito, K.; Matsuo, Y.; Imafuji, H.; Okubo, T.; Maeda, Y.; Sato, T.; Shamoto, T.; Tsuboi, K.; Morimoto, M.; Takahashi, H.; Ishiguro, H. Xanthohumol inhibits angiogenesis by suppressing nuclear factor- $\kappa$ B activation in pancreatic cancer. *Cancer Sci.* **2018**, *109*, 132–140. <https://doi.org/10.1111/cas.13441>
148. Kimura, Y.; Baba, K. Antitumor and antimetastatic activities of Angelica keiskei roots, part 1: Isolation of an active substance, xanthoangelol. *Int. J. Cancer* **2003**, *106*, 429–437. <https://doi.org/10.1002/ijc.11256>
149. Chung, C.H.; Chang, C.H.; Chen, S.S.; Wang, H.H.; Yen, J.Y.; Hsiao, C.J.; Wu, N.L.; Chen, Y.L.; Huang, T.F.; Wang, P.C. Butein inhibits angiogenesis of human endothelial progenitor cells via the translation dependent signaling pathway. *Evid. Based Complement. Alternat. Med.* **2013**, 943187. <https://doi.org/10.1155/2013/943187>
150. Moon, D.O.; Choi, Y.H.; Moon, S.K.; Kim, W.J.; Kim, G.Y. Butein suppresses the expression of nuclear factor-kappa B-mediated matrix metalloproteinase-9 and vascular endothelial growth factor in prostate cancer cells. *Toxicol. Vitro* **2010**, *24*, 1927–1934. <https://doi.org/10.1016/j.tiv.2010.08.002>
